# Supplementary material
Source: publisher figshare collection journal article supplement (https://acs.figshare.com/ndownloader/files/4256293)
Supplement: Supplementary file 1 [file 4256293]

## Supporting Information

Single-crystalline sodium-doped p-type ZnO and ZnMgO nanowires via combination of thin-film and nano techniques

**Haiping He<sup>#,†,‡</sup>, Shisheng Lin<sup>#,‡,§</sup>, Guodong Yuan<sup>†</sup>, Liqiang Zhang<sup>‡</sup>, Wenfeng Zhang<sup>†</sup>, Linbao Luo<sup>†</sup>, Yulin Cao<sup>†</sup>, Zhizhen Ye<sup>‡,\*</sup>, Shuit Tong Lee<sup>†,\*</sup>**

# These authors contribute equally to this work.

† Center of Super-Diamond and Advanced Film (COSDAF) and Department of Physics and Materials Science, City University of Hongkong, Hong Kong SAR (China)

‡ State Key Laboratory of Silicon Materials, Department of Materials Science and Engineering, Zhejiang University, Hangzhou 310027, People's Republic of China

§ Department of Optical Engineering, Zhejiang University, Hangzhou 310027, P. R. China

\* To whom correspondence should be addressed, E-mail: apannale@cityu.edu.hk (S. T. Lee); yezz@zju.edu.cn (Z. Z. Ye)

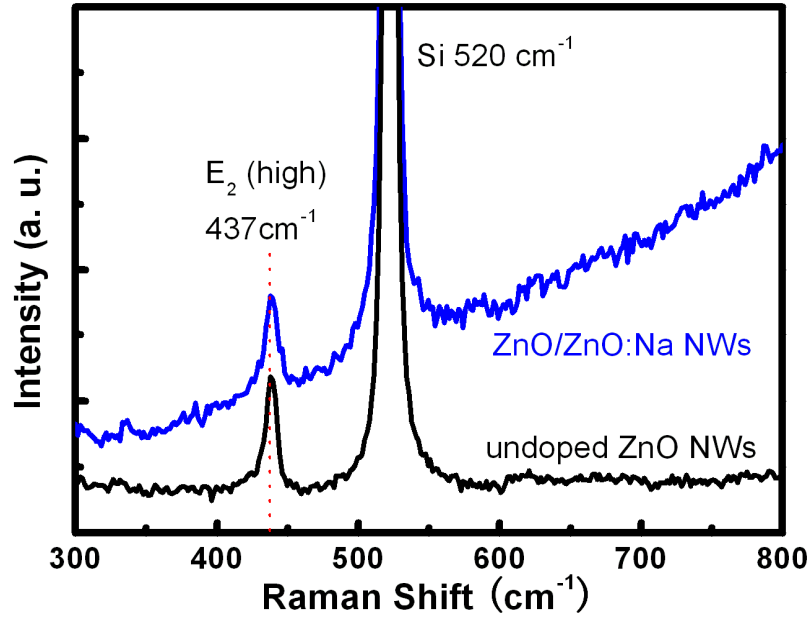

**Fig. S1** Raman backscattering spectra of the undoped ZnO NWs and ZnO/ZnO:Na core-shell NWs array. Both NWs show the  $E_2$  (high) mode of ZnO at  $437\text{ cm}^{-1}$ , which agrees well with the reported value of bulk ZnO. The results indicate that the NWs are almost stress-free. In addition, the defect-sensitive  $A_1(\text{LO})$  mode at  $575\text{ cm}^{-1}$  is not observed, indicating low defect density in both samples.

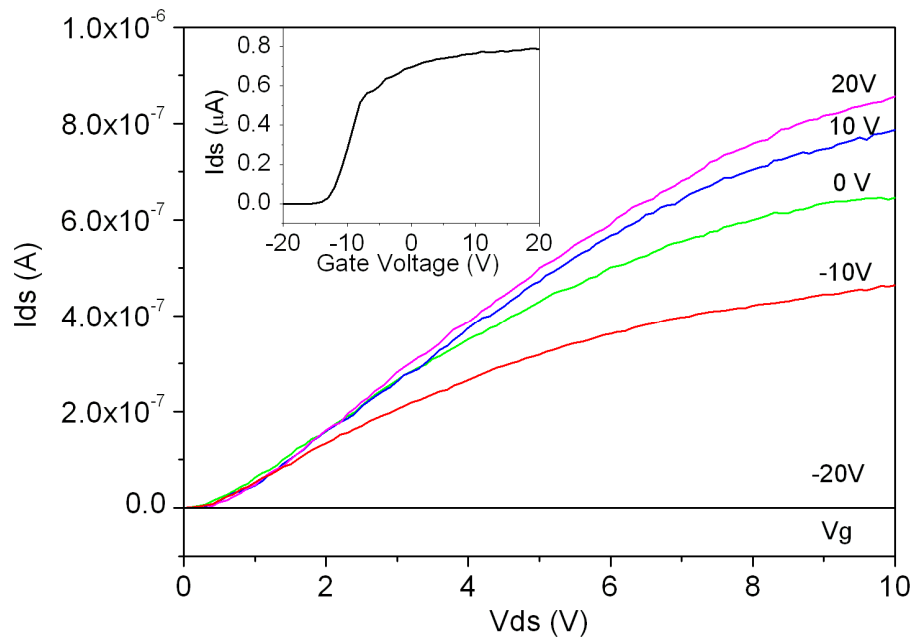

**Fig. S2** Output and transfer characteristics (inset) of undoped ZnO NW-FET, showing  $n$ -type conductivity.

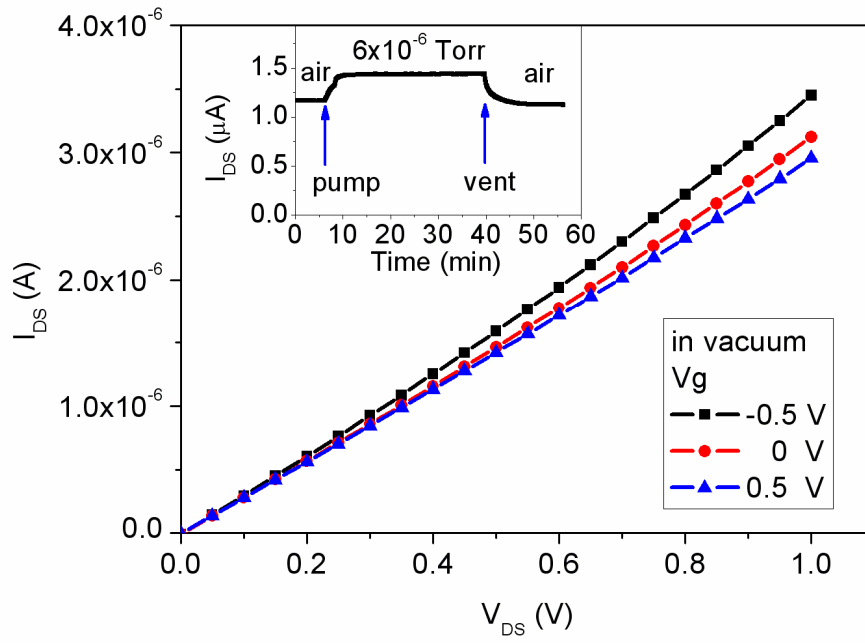

**Fig. S3** Output characteristics of annealed ZnO/ZnO:Na core-shell NW-FET measured in high vacuum. The nanowire remain *p*-type conductivity. Inset shows the  $I_{DS}$  measured in air and vacuum. The current shows slight change in vacuum, indicating low density surface states in the nanowires.
